# Supplementary material for: Pan-Canadian survey on the impact of the COVID-19 pandemic on cervical cancer screening and management: cross-sectional survey of healthcare professionals
Source: eLife journal article supplement (doi:10.7554/elife.83764), 2023-06-28
Supplement: supp [file elife-83764-supp-v1.zip]

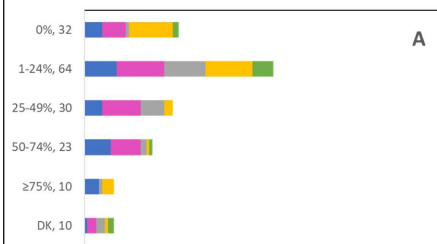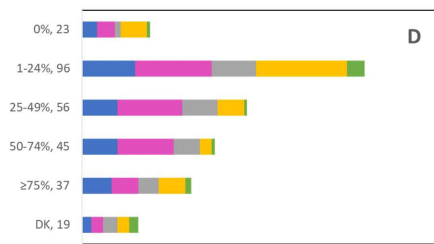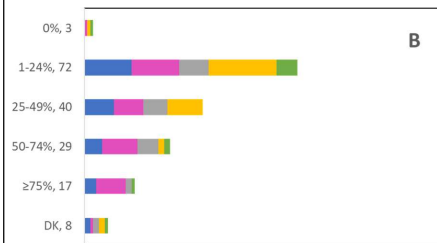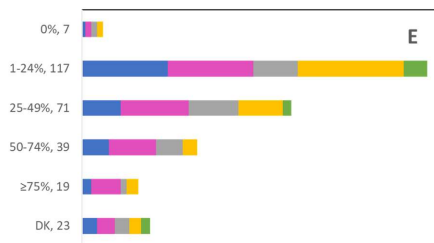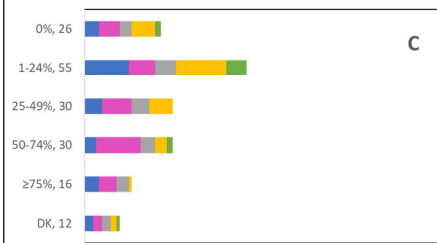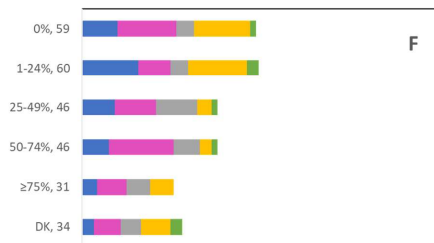

■ University-affiliated hospital 
 ■ Community hospital 
 ■ Public clinic 
 ■ Private clinic 
 ■ Community health center
