# Supplementary figures and images for: Pan-Canadian survey on the impact of the COVID-19 pandemic on cervical cancer screening and management: cross-sectional survey of healthcare professionals
Source: eLife journal article supplement (doi:10.7554/elife.83764), 2023-06-28

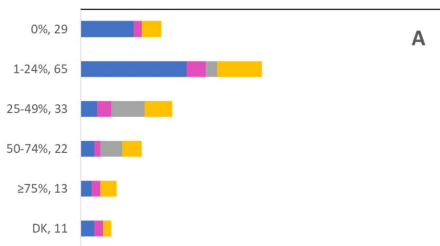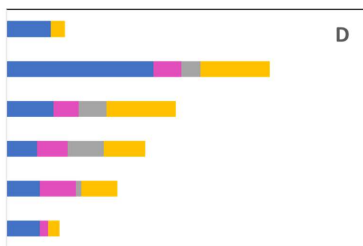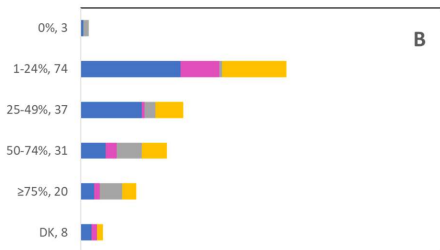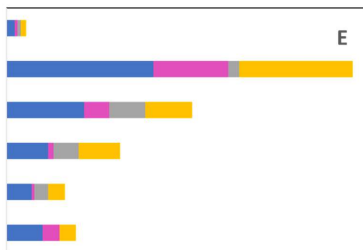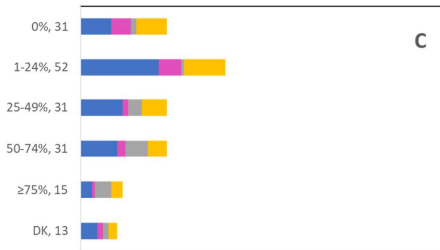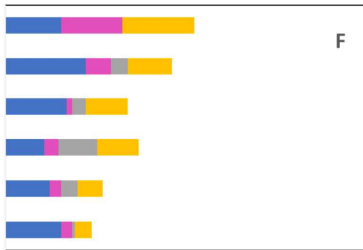

■ Primary ■ Secondary (clinical) ■ Secondary (cytological) ■ Tertiary

Supplement: supp [file elife-83764-supp-v1.zip]

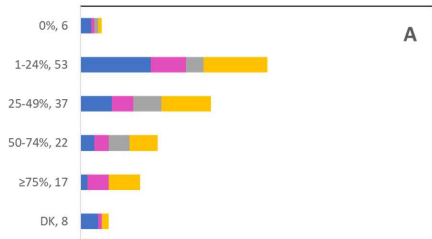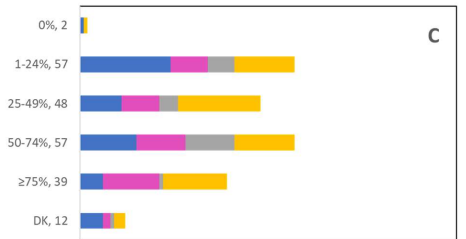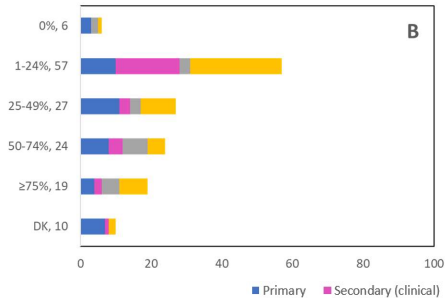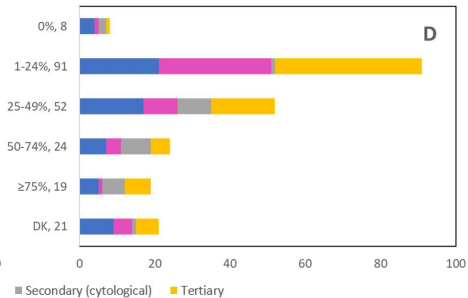

Supplement: supp [file elife-83764-supp-v1.zip]

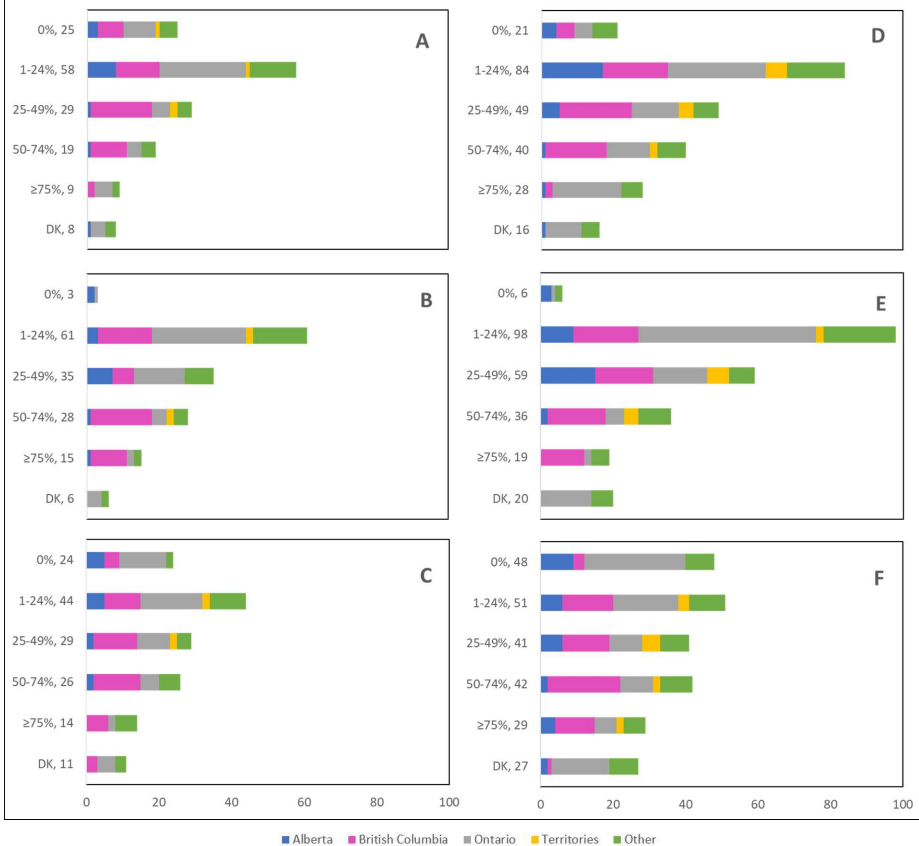

Supplement: supp [file elife-83764-supp-v1.zip]

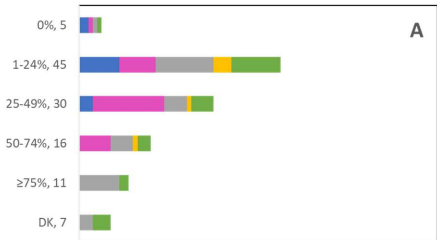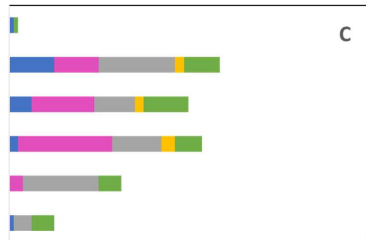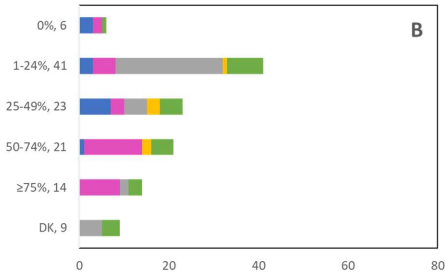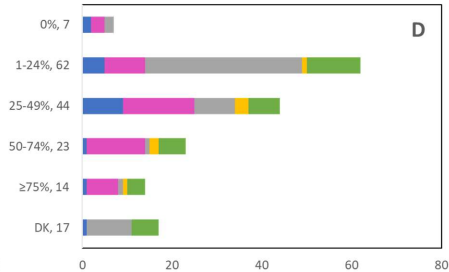

Supplement: supp [file elife-83764-supp-v1.zip]
